# Supplementary material
Source: ML conference proceedings conference paper supplement (https://openaccess.thecvf.com/content/CVPR2022/html/Ramakrishnan_PONI_Potential_Functions_CVPR_2022_paper.html)
Supplement: Supplementary file 2 [file Ramakrishnan_PONI_Potential_Functions_CVPR_2022_supplemental.zip]

Archive with 3 entries (3 files):
- 09443-poni-supp-demo-compressed.mp4
- 09443-poni-supp-doc-compressed.pdf
- __MACOSX/._09443-poni-supp-doc-compressed.pdf
